# Supplementary material for: Efficient liquid-phase hydrogenolysis of a lignin model compound (benzyl phenyl ether) using a Ni/carbon catalyst
Source: Royal Society of Chemistry journal article supplement (doi:10.1039/c8re00304a), 2019-01-01
Supplement: c8re00304a1.pdf [file c8re00304a1.pdf]

## Supporting Information

### Efficient Liquid-Phase Hydrogenolysis of Lignin Model Compound (Benzyl Phenyl Ether) Using a Ni/Carbon Catalyst

Babasaheb M. Matsagar,<sup>a†</sup> Ting-Cih Kang,<sup>a†</sup> Zheng-Yen Wang,<sup>a</sup> Takuya Yoshikawa,<sup>b</sup> Yuta Nakasaka,<sup>b</sup> Takao Masuda,<sup>b</sup> Li-Ching Chuang,<sup>c</sup> and Kevin C.-W. Wu<sup>ade\*</sup>

<sup>a</sup> Department of Chemical Engineering, National Taiwan University, No. 1, Sec. 4, Roosevelt Road, Taipei 10617, Taiwan.

<sup>b</sup> Division of Applied Chemistry, Hokkaido University, Kita-13 Nishi-8, Kita-ku, Sapporo, Hokkaido 060-8628, Japan.

<sup>c</sup> Division of Chemical Engineering, Institute of Nuclear Energy Research, Taoyuan 320, Taiwan.

<sup>d</sup> Center of Atomic Initiative for New Materials (AI-MAT), National Taiwan University.

<sup>e</sup> International Graduate Program of Molecular Science and Technology, National Taiwan University (NTU-MST).

† The first two authors contribute this work equally.

\*Corresponding author

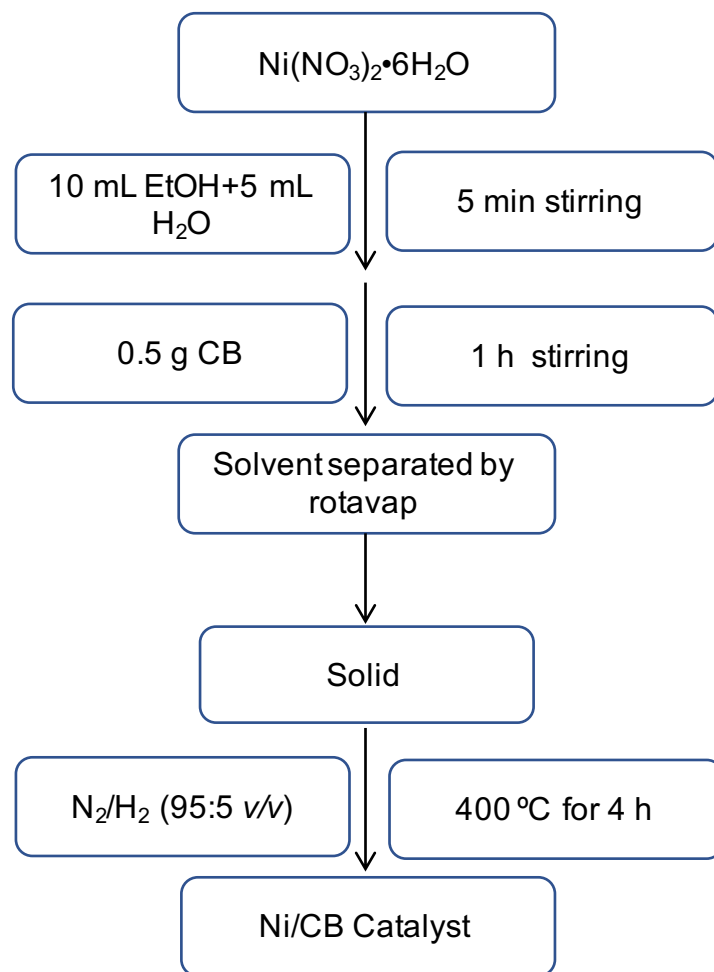

**Figure S1.** Illustration for the synthesis of Ni/CB catalyst.

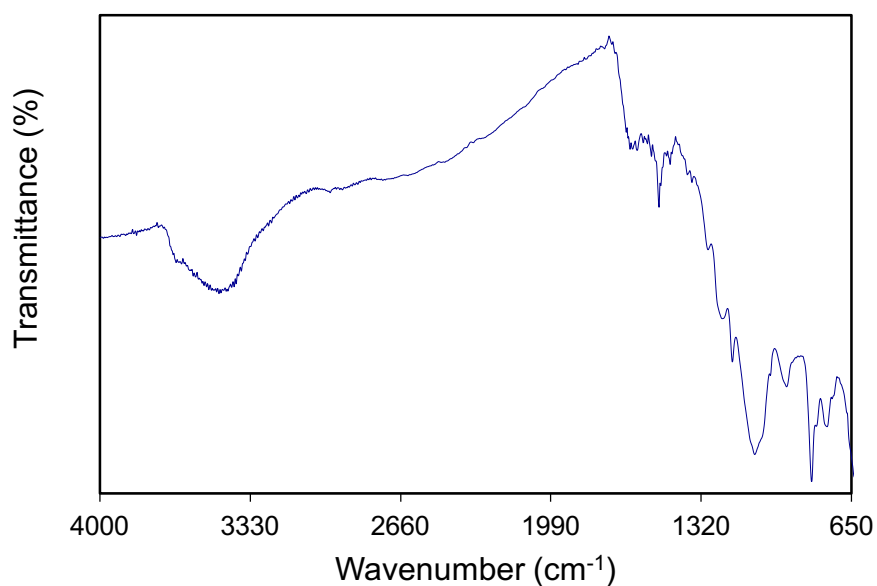

**Figure S2.** FT-IR spectra of Ni/CB catalyst.

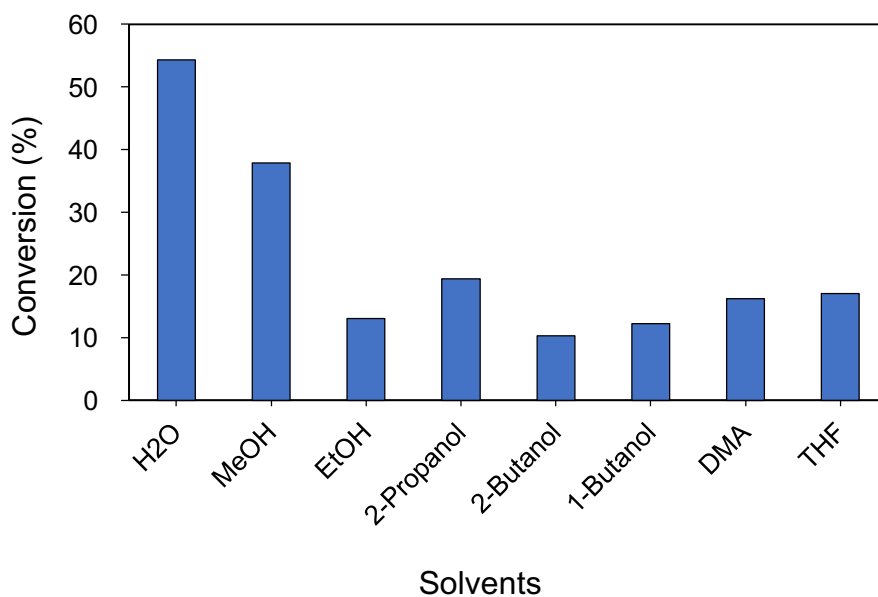

**Figure S3.** Effects of solvents for the BPE hydrogenolysis.

Reaction condition: BPE 0.0368 g, NaBH<sub>4</sub> 0.05 g, Ni/CB 0.04 g, solvent 10 mL, 70 °C, 1 h.

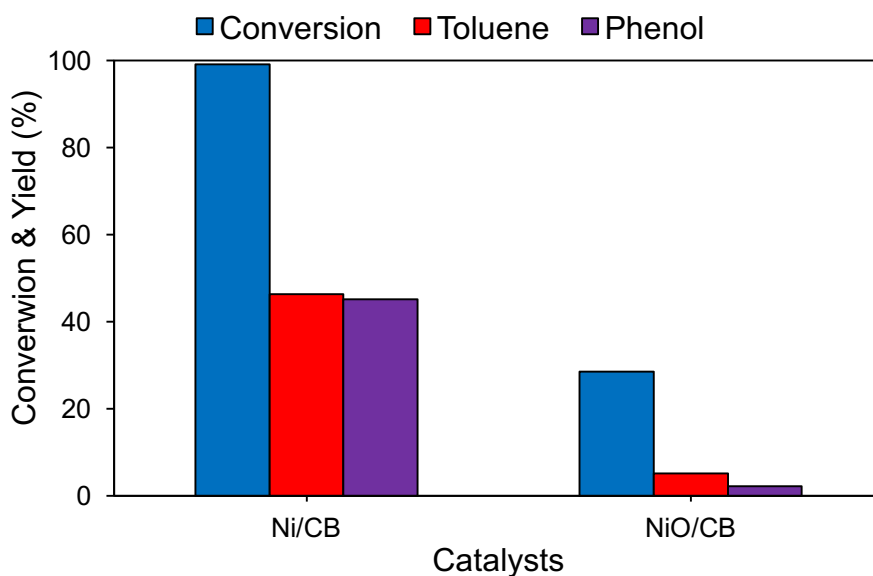

**Figure S4.** Effects of Ni catalysts for the BPE hydrogenolysis.

Reaction condition: BPE 0.0368 g, NaBH<sub>4</sub> 0.05 g, catalyst 0.05 g, solvent 10 mL, 80 °C, 1 h.

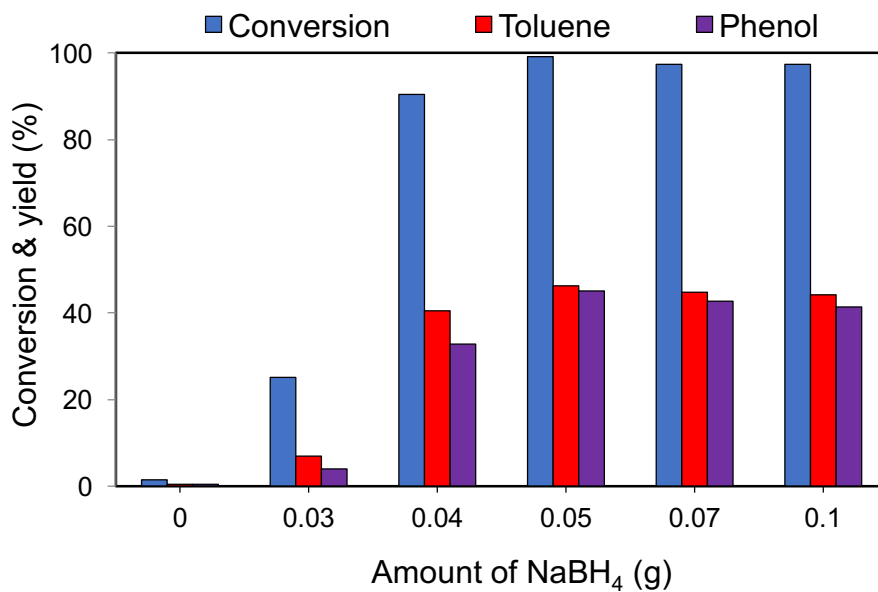

**Figure S5.** Effects of NaBH<sub>4</sub> concentration for the BPE hydrogenolysis.

Reaction condition: BPE 0.0368 g, Ni/CB 0.05 g, EtOH/H<sub>2</sub>O 10 mL (3/7 v/v), 80 °C, 1 h.

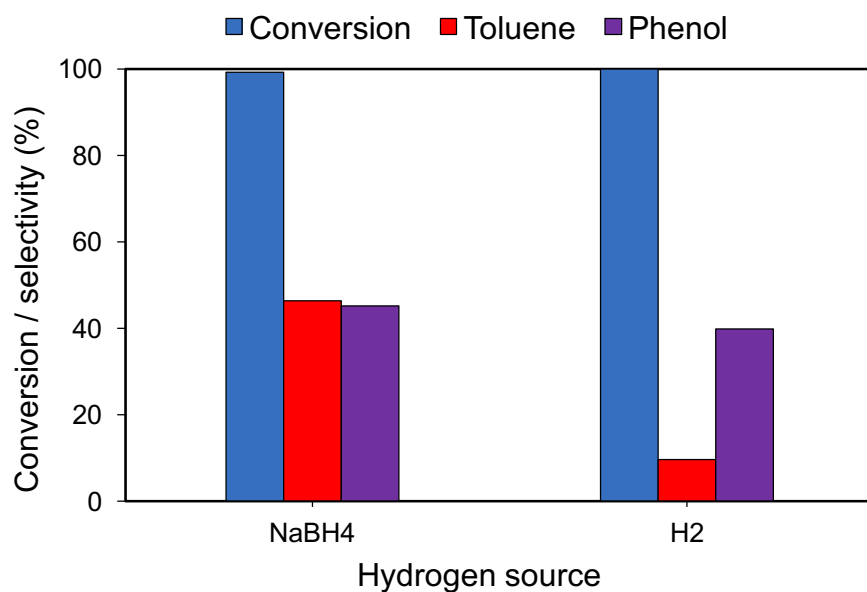

**Figure S6.** Effects of hydrogen source for the BPE hydrogenolysis.

Reaction condition: BPE 0.0368 g, NaBH<sub>4</sub> 0.05 g/H<sub>2</sub> 0.2 MPa, catalyst 0.05 g, solvent 10 mL, 80 °C, 1 h.

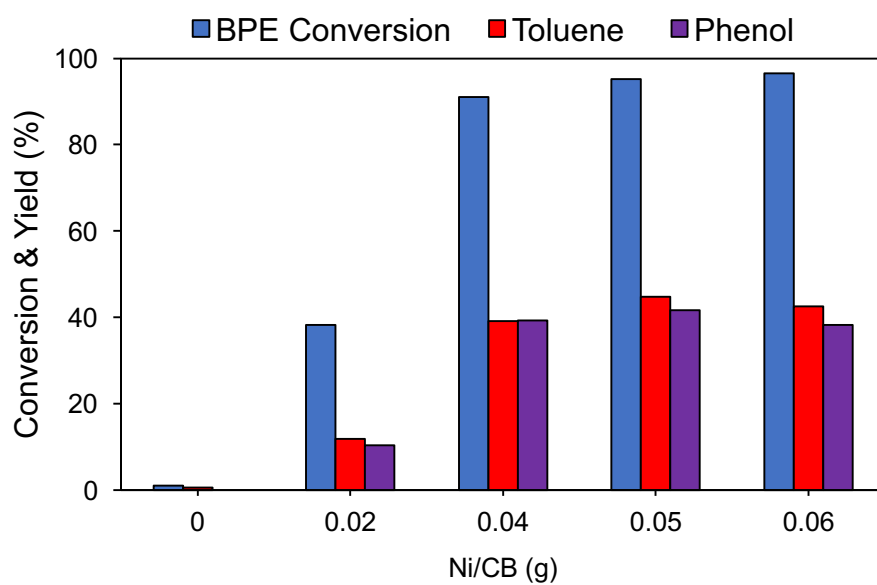

**Figure S7.** Effects of Ni/CB catalyst concentration for the BPE hydrogenolysis.  
Reaction condition: BPE 0.0368 g, NaBH<sub>4</sub> 0.05 g, EtOH/H<sub>2</sub>O 10 mL (3/7 v/v), 70 °C, 1 h.

### Hydrolysis of NaBH<sub>4</sub> in water and in mixed solvent (EtOH/H<sub>2</sub>O) system:

**Preparation of HPLC sample:** After hydrolysis reaction of NaBH<sub>4</sub> in the mixed solvent in presence of Ni/CB catalyst. The solvent was evaporated using a rotary evaporator and the obtained solid dried in an oven at 105 °C for 16 h. Next, the dried solid was added in 10 mL of H<sub>2</sub>O. Further, the sample was filtered through a 0.22-micron syringe filter to remove catalyst and then it was injected in HPLC (For this analysis HPLC equipped with Pb<sup>2+</sup> column was used).

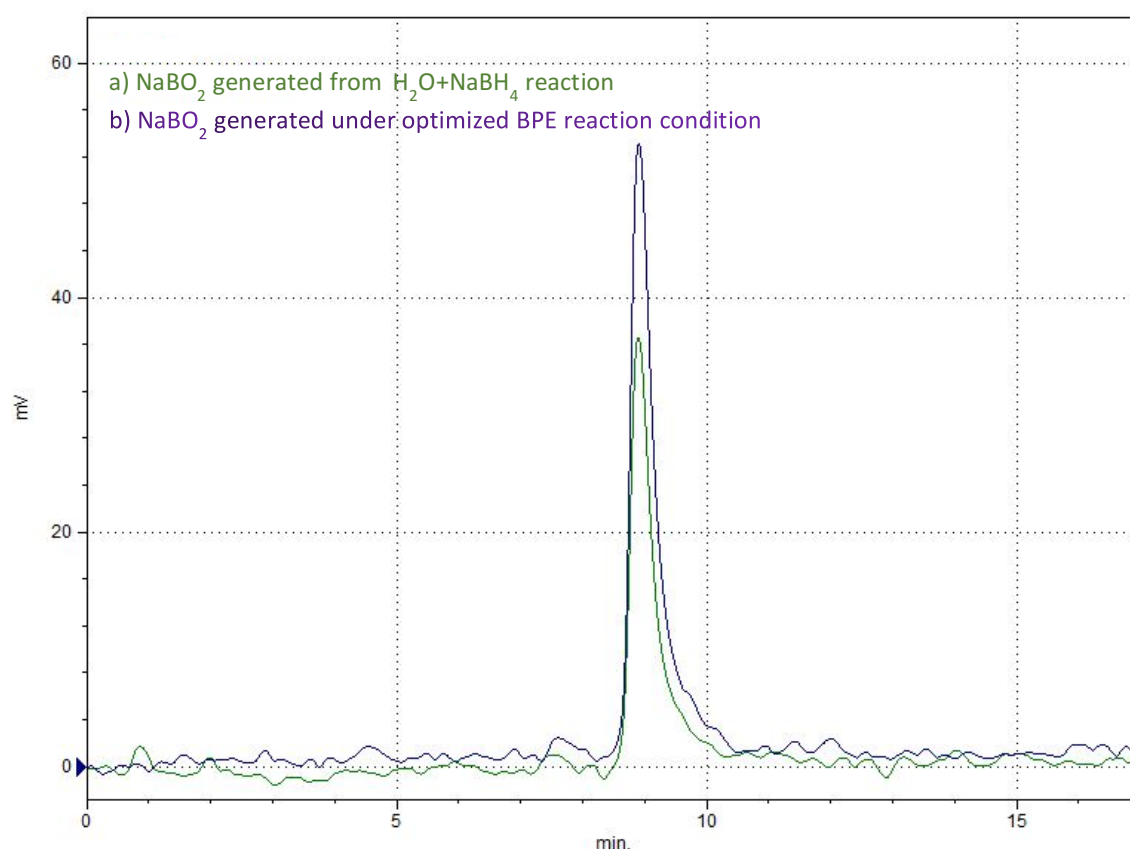

**Fig S8.** HPLC chromatogram of a) NaBO<sub>2</sub> generated by hydrolysis of NaBH<sub>4</sub> in water and b) hydrolysis of NaBH<sub>4</sub> in mixed solvent (EtOH/H<sub>2</sub>O).

Reaction condition: NaBH<sub>4</sub> 0.05 g, EtOH/H<sub>2</sub>O 10 mL (3/7 v/v), Ni/CB 0.05 g, 80 °C, 1 h.

The NaBH<sub>4</sub> is hydrolyzed and converted into hydrated or anhydrous sodium metaborate (NaBO<sub>2</sub>). The formation of NaBO<sub>2</sub> from NaBH<sub>4</sub> hydrolysis was reported and, in our experiment, also we have found the formation of NaBO<sub>2</sub> (Fig. S8).

**Table S1** Results of BET analysis for adsorption of various solvents on the support\*

| Support               | Surface area (m <sup>2</sup> /g) | Relative volume (%) |      |         | Resistance (Ω) |
|-----------------------|----------------------------------|---------------------|------|---------|----------------|
|                       |                                  | H <sub>2</sub> O    | EtOH | Benzene |                |
| Carbon black (CB)     | 97.0                             | 0.60                | 0.74 | 0.3     | 1.8            |
| Activated carbon (AC) | 998.3                            | 0.18                | 0.63 | 0.44    | 1913.3         |

\*N<sub>2</sub> was used as reference

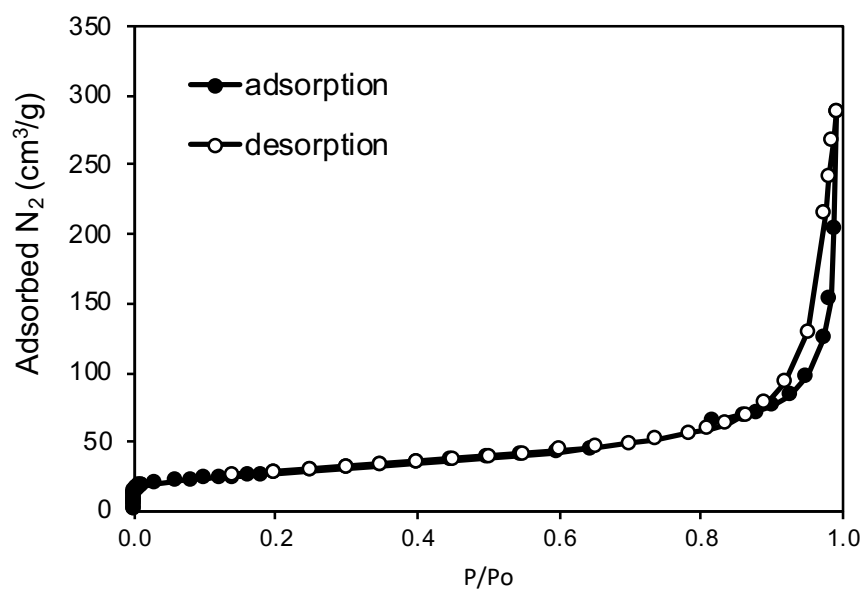

**Figure S9.** N<sub>2</sub> adsorption / desorption isotherm of carbon black (BC).

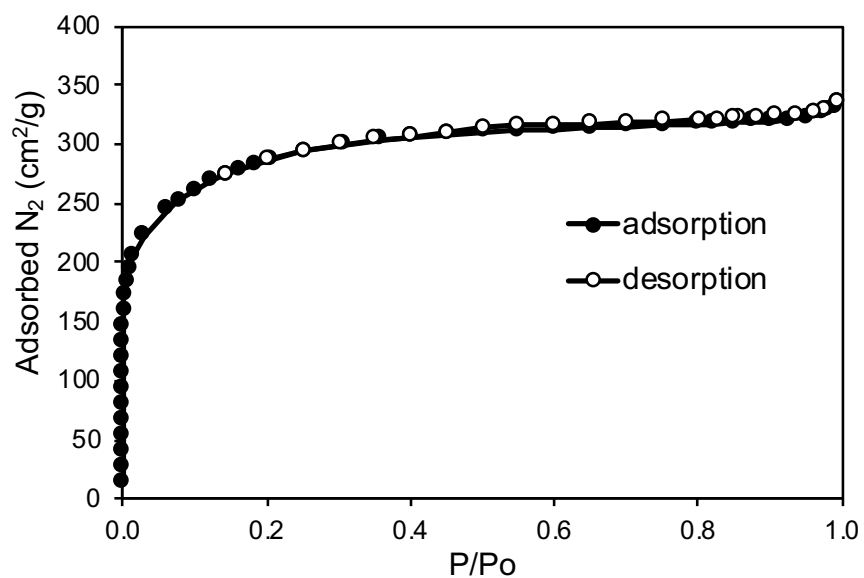

**Figure S10.** N<sub>2</sub> adsorption / desorption isotherm of active carbon (AC).

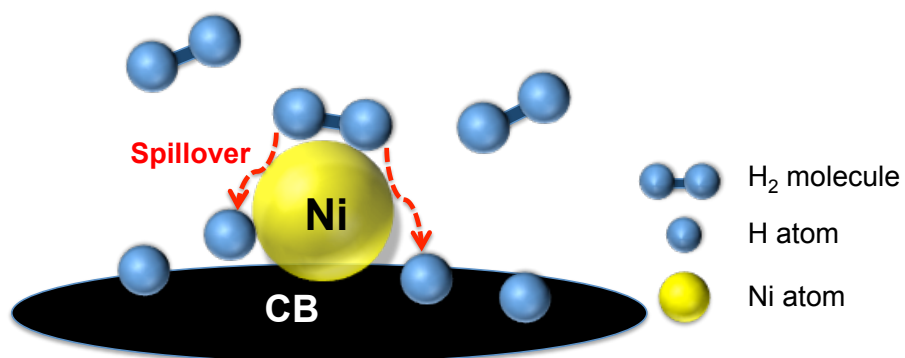

**Figure S11.** Proposed mechanism for hydrogen spillover on Ni/CB catalyst.
